# Mendelian randomisation study exploring the associations of serum folate with pan and site-specific cancers

## Authors

Kimberley Burrows<sup>1,2</sup>; Nabila Kazmi<sup>1,2</sup>; Philip Haycock<sup>1,2</sup>; Konstantinos, K Tsilidis<sup>3,4</sup>; the PRACTICAL consortium, CRUK, BPC3, CAPS and PEGASUS\*; GECCO, CORECT and CCFR\*\*;  
Richard, M Martin<sup>1,2,5</sup>; Sarah, J Lewis<sup>1,2,5</sup>

<sup>1</sup>MRC Integrative Epidemiology Unit (IEU), Bristol Medical School, University of Bristol, Bristol, UK

<sup>2</sup>Population Health Sciences, Bristol Medical School, University of Bristol, Bristol, UK

<sup>3</sup>Department of Hygiene and Epidemiology, University of Ioannina School of Medicine, Ioannina, Greece

<sup>4</sup>Department of Epidemiology and Biostatistics, School of Public Health, Imperial College London, London, UK

<sup>5</sup>National Institute for Health Research (NIHR) Bristol Biomedical Research Centre, University Hospitals NHS Trust and University of Bristol, Bristol, UK.

\*Members from the PRACTICAL Consortium, CRUK, BPC3, CAPS and PEGASUS are provided in the supplement.

\*\*Members from the GECCO, CORECT and CCFR consortia are provided in the supplement

Corresponding author

**Contact details of the corresponding authors:**

Dr Kimberley Burrows

Email: [kimberley.burrows@bristol.ac.uk](mailto:kimberley.burrows@bristol.ac.uk)

Telephone: +44 (0) 117 3310083

Address: Oakfield House, Oakfield Grove

University of Bristol

Bristol, BS8 2BN

UK

## Abstract

**Background:** Epidemiological studies report evidence for an association between folate, an essential B vitamin, and the risk of several common cancers. However, both protective and harmful effects have been reported, and effects may differ by cancer site. These associations suggest that modulating dietary folate, or its synthetic form folic acid, could be used to modify population-wide cancer risk. However, observational studies are liable to biases, including residual confounding and reverse causation, thus limiting causal inference. Using Mendelian randomisation (MR), we investigated the causal relationships of genetically determined serum folate with pan-cancer risk (all cancers excluding non-melanoma skin cancers); breast, prostate, ovarian, lung, and colorectal cancers; and malignant melanoma.

**Methods:** Using publicly available genome-wide association study (GWAS) summary data, we identified genetic instruments to proxy serum folate levels and analysed these using GWAS summary statistics of risk of pan-cancer and six site-specific cancers available from large consortia and the population-based cohort study UK Biobank (UKBB) within a two-sample Mendelian randomisation framework. We conducted MR using the inverse variance weighted (IVW) method and the likelihood-based approach. We performed sensitivity analyses to assess potential violations of MR assumptions.

**Results:** We identified three SNPs (rs1801133, rs1999594, rs7545014) robustly associated with serum folate in a healthy, young adult Irish population using publicly available GWAS summary data. There was little evidence that genetically increased serum folate was associated with risk of pan-cancer or six site-specific cancers. Meta-analysis showed odds ratios (OR) per standard deviation (SD) increase in  $\log_{10}$  serum folate of 0.92 (95% confidence interval 0.78-1.07) for breast cancer, 0.87 (95% confidence interval 0.71-1.06) for prostate cancer, 0.87 (95% confidence interval 0.61-1.25) for ovarian cancer, 0.87 (95% confidence interval 0.57-1.34) for lung cancer, and 1.26 (95% confidence interval 0.84-1.88) for colorectal cancer. ORs for pan-cancers and malignant melanoma in UKBB were 0.86 (95% confidence interval 0.71-1.03) and 0.57 (95% confidence interval 0.30-1.10) respectively. The results were powered to detect modest effect sizes (>80% power [ $\alpha=0.05$ ] to detect ORs 1.1 (or its inverse 0.9) for the cancer GWAS consortia) and were consistent between the two statistical approaches used (IVW and likelihood-based).

**Conclusions:** There is little evidence that genetically increased serum folate may affect the risk of pan-cancer and six site-specific cancers. However, we may still be underpowered to detect clinically relevant but smaller magnitude effects. Our results provide some evidence that increasing levels of circulating folate through widespread supplementation or deregulation of fortification of foods with folic acid is unlikely to lead to moderate unintended population-wide increase in cancer risk.

## Keywords

Cancer, diet, nutrition, folate, Mendelian randomisation

## 1 Introduction

2 Folate is an essential B vitamin found in foods such as dark leafy green vegetables, liver and legumes. Serum  
3 folate reflects recent folate intake and is the earliest biomarker to detect folate status[1]. Folic acid, the  
4 synthetic form of folate, is available as a dietary supplement and is used to fortify food such as bread flour in  
5 over 80 countries worldwide[2]. At the time of writing, many European countries, including the UK have yet  
6 to decide or have rejected a mandate of folic acid fortification, with some countries opting for a voluntary  
7 scheme or no population-wide intervention at all[2]. Recently, the UK government has released a report  
8 conducted by the Scientific Advisory Committee on Nutrition (SACN)[3] and proposed a public consultation on  
9 the mandatory fortification of flour with folic acid. Decisions by governments regarding this public health  
10 intervention are made based on all evidence of adverse effects including any potential cancer risk.

11 Folate has an essential role in the synthesis and methylation of DNA and is a crucial co-factor in one-carbon  
12 metabolism together with other B vitamins such as vitamins B2, B6, and B12[4]. In developing foetuses,  
13 insufficient folate increases the risk of neural tube defects, including spina bifida and anencephaly[5,6]. In  
14 adults, insufficient folate can lead to anaemia[7]. There is also a suggestion that low folate may contribute to  
15 carcinogenesis through aberrations in DNA methylation and uracil misincorporation, leading to DNA  
16 instability[8]. Folic acid supplementation was shown to have tumour-promoting effects in mouse models[9].

17 Epidemiological studies exploring associations of folate with the risk of developing site-specific cancers have  
18 been inconsistent. For instance, total folate, dietary folate and serum folate levels have been reported to have  
19 no associations with breast cancer[10,11], whilst in contrast, a meta-analysis of 26 case-control studies reports  
20 protective effects of higher dietary folate intake[12]. Likewise, some meta-analyses suggest positive  
21 associations between serum folate and prostate cancer[13], while others suggest no evidence of associations  
22 with folate intake[14,15]. These inconsistencies are also present for studies examining folate and colorectal  
23 cancer[16,17]. Much of the observational studies to date are limited due to small study sample sizes,  
24 measurement error, heterogeneity of the exposure measurement (dietary intake vs. supplement intake vs.  
25 circulating levels), timing of folate measurement (leading to possible reverse causation), and the use of data  
26 from both pre- and post- folic acid fortification study populations[18].

27 Several randomised control trials (RCTs) have been conducted exploring the effects of folic acid  
28 supplementation on a range of primary outcomes while having also recorded incident cancers. A 2013 pooled  
29 analysis of such RCTs compared folic acid supplementation and placebo for the incidence of cancers during  
30 treatment periods. The primary outcome of interest was overall cancer, with additional analyses within site-  
31 specific cancers. In total, 3,713 cancers were reported in around 50,000 participants with a weighted average  
32 treatment period of 5.2 years (range 1.8 to 7.4 years). The meta-analysis reported little evidence that folic acid  
33 treatment increased (or decreased) risk of overall cancer compared to placebo. Furthermore, there was no  
34 evidence of association in any of the site-specific cancers including colorectal, lung, ovarian, breast, malignant  
35 melanoma, and prostate cancer[19]. However, these trials are limited by the small number of incident cancer  
36 cases and the short duration of treatment time during the trials. The meta-analysis could not address whether  
37 there were any beneficial or adverse effects to folic acid supplementation within more prolonged periods after  
38 the trials had ended.

39 Mendelian randomisation (MR) is an instrumental variable analytical approach which utilises common genetic  
40 variants as instruments to proxy potentially modifiable risk factors. The aim of MR is to elucidate the causal  
41 effects of these risk factors on disease outcomes of interest[20,21]. Germline genetic variants are randomised  
42 and fixed at conception, enabling MR analysis to mitigate the major biases of observational studies such as  
43 residual confounding, measurement error and reverse causation. The aim of the current study was to apply  
44 MR within a two-sample framework to elucidate the causal associations of serum folate with pan-cancer risk;  
45 cancers of the breast, prostate, ovaries, lung, and colorectum; and malignant melanoma.

46

## 47 **Materials and Methods**

### 48 **Genetic instrument selection for serum folate**

49 We conducted a search of published genome-wide association studies (GWAS) using MR-Base[22] and  
50 PubMed (<https://www.ncbi.nlm.nih.gov/pubmed/>). Studies with single nucleotide polymorphisms (SNPs) that  
51 were robustly associated at P-value  $<5 \times 10^{-8}$  with serum folate levels and involving participants of European  
52 ancestry were prioritised. We identified a moderately sized GWAS of serum folate in a healthy, young adult  
53 Irish population consisting of 2,232 individuals with full summary statistics available[23]. Additionally, GWAS  
54 within an Italian population and a large GWAS in an Icelandic population were identified[24,25]. Food  
55 manufacturers in the Republic of Ireland (at the time of writing) voluntarily fortify foods with folic acid, in line  
56 with the UK[26]. Given the similar ancestry, dietary intakes and current policy in fortification we choose to  
57 utilise the genetic association results for the Irish study to match these demographics to those of the  
58 participants from UKBB, which was used as the outcome sample in the 2-sample MR framework, and which  
59 consists of UK participants. For the large GWAS consortia datasets; participants were recruited to studies from  
60 Europe (including the UK) and the USA.

61 Five SNPs (rs1801133, rs1999594, rs12085006, rs7545014, and rs7554327) from Shane *et al.*[23] located  
62 within a 100kb region around the methylenetetrahydrofolate reductase (*MTHFR*) gene and identified among  
63 individuals of European ancestry were identified as potential instruments. We excluded rs12085006 and  
64 rs7554327 as they are in near-perfect linkage disequilibrium (LD) with rs1999594 ( $R^2$  1.00) and rs7545014 ( $R^2$   
65 0.99) respectively. Detailed information on the selected genetic instruments is provided in Table 1.

### 66 **Data on the genetic epidemiology of cancers**

67 We retrieved summary statistics of the genetic effects for the selected instruments on the risk of site-specific  
68 cancers from large, recently published GWAS. Four large consortia had publicly available summary statistics  
69 for breast cancer (BCAC - Breast Cancer Association Consortium), prostate cancer (PRACTICAL - Prostate  
70 Cancer Association Group to Investigate Cancer Associated Alterations in the Genome), ovarian cancer (OCAC  
71 - Ovarian Cancer Association Consortium), and lung cancer (ILCCO - International Lung Cancer Consortium).  
72 Summary statistics were made available for colorectal cancer from the Genetic and Epidemiology of Colorectal  
73 Cancer Consortium (GECCO), the Colorectal Cancer Transdisciplinary Study (CORECT), and the Colon Cancer  
74 Family Registry (CCFR) consortia (GECCO-CORECT-CCFR). In Supplementary methods we further describe each  
75 of these datasets. Information on quality control, imputation and statistical analysis for each GWAS has been  
76 previously reported[27–31].

77 The UK Biobank is a population-based health research resource consisting of approximately 500,000 people,  
78 aged between 38 years and 73 years, who were recruited between the years 2006 and 2010 from across the  
79 UK[32]. We performed GWAS for cancers of the breast, prostate, ovaries, lung, colorectal and malignant  
80 melanoma in the population-based UK Biobank (UKBB) cohort[33]. Cancers were identified by linkage of each  
81 participant in the cohort to the UK Cancer Registry. Cases were defined as having a diagnosed cancer  
82 throughout the life-course of the UKBB study participants. That is, the cancer diagnosis occurred either before  
83 or after enrolment to the UKBB study. A list of the ICD09 and ICD10 codes used to define each site-specific  
84 cancer are included in Supplementary Table S1. We also performed GWAS for pan-cancer in UKBB using data  
85 for all cancer sites (ICD9:140.0-208.9 and ICD10:C00-C97 specific codes with the exclusion of ICD10:C44.0-  
86 C44.9; ICD9:173.0-173.9 non-melanoma skin cancers). Further details on the definition of cases and controls,  
87 quality control, imputation, GWAS and statistical analysis can be found in the Supplementary Methods and

88 Supplementary Table S1. All three instruments for serum folate were available in each of the GWAS consortia  
89 and in UKBB.

### 90 **Mendelian randomisation analysis**

91 We conducted two-sample MR analyses to appraise the potential causality of associations between serum  
92 folate and the risk of pan-cancer and six site-specific cancers (breast, prostate, ovarian, colorectal, lung and  
93 malignant melanoma)[34].

94 The beta-coefficients for the associations of each SNP with serum folate levels were reported on the Log<sub>10</sub>  
95 scale. These were converted to the standard deviation (SD) scale to represent an SD change in log<sub>10</sub>  
96 transformed serum folate with each additional effect allele (see supplementary material). We harmonised the  
97 SNPs so that the effect alleles were the serum folate increasing alleles.

98 The three SNPs are located within a 100kb region around the *MTHFR* gene on chromosome 1 and are in weak  
99 LD with each other (all  $R^2 < 0.45$ ) (see Supplementary Table S2). The use of multiple correlated SNPs (such as  
100 these) introduces bias in the precision of the overall causal effect estimates. To mitigate this bias of over  
101 precision, we used extensions of the fixed-effect inverse variance weighted (IVW) method and the likelihood-  
102 based approach to account for the correlation structure between the SNPs using a matrix of SNP  
103 correlations[35,36]. A matrix of correlations was constructed using the TwoSampleMR R package, which uses  
104 reference data on participants of European ancestry within the 1000 Genomes project (Phase 3)[37].

105 Fixed-effects IVW meta-analysis was performed to pool the MR estimates from the GWAS consortia studies  
106 and UKBB for the following cancers: breast, prostate, ovarian, colorectal and lung. Cochran's Q statistic was  
107 used to assess heterogeneity between studies.

### 108 **Sensitivity analyses**

109 The validity of the effect estimates and interpretation in MR analyses are reliant on the following  
110 assumptions[38]: i) the selected genetic instruments are robustly associated with serum folate; ii) the genetic  
111 instruments affect cancer only through their effect on serum folate; and iii) the instruments are independent  
112 of any confounders of the association between serum folate and cancer.

113 To evaluate the first MR assumption, we estimated the variance in serum folate explained ( $R^2$ ) by each SNP as  
114 well as the strength of the instruments represented by the F-statistic. The  $R^2$  and the F-statistic can be used to  
115 evaluate the strength of our instruments and to indicate weak instrument bias[39]. Derivation of the  $R^2$  and  
116 the F-statistic is given in the Supplementary methods. To evaluate potential violation of the second and third  
117 assumption, we performed look-ups for each of our instruments using the MR-Base PheWAS  
118 (<http://phewas.mrbase.org/>) tool to determine the presence of associations with secondary phenotypes that  
119 could be potential confounders of the association. Due to the limited number of folate SNPs, and their  
120 correlation, we were unable to assess potential violations of the second assumption of MR (no horizontal  
121 pleiotropy) using statistical methods (MR-Egger, weighted median and mode estimators).

122 Cochran's Q statistic was calculated to assess heterogeneity across SNPs in the causal estimate, with the null  
123 hypothesis being that such differences between individual-SNP effect sizes are due to chance[40]. Where there  
124 was evidence of heterogeneity (P-value <0.05), a (multiplicative) random-effects IVW and maximum likelihood  
125 MR analysis[41] was performed, accounting for the correlation between SNPs.

126 To further elucidate the potential impact of using correlated SNPs as an instrument we derived the magnitude  
127 to which increasing folate might affect the risk of cancer by calculating the ratio of coefficients (Wald  
128 ratios)[42] for each SNP individually. The corresponding SEs were derived using the delta method[43]. In  
129 addition, we explored systematically whether an individual SNP was driving the main MR association results

130 by performing a leave-one-out analysis, whereby IVW estimates are derived iteratively by excluding each SNP  
131 in turn.

### 132 **Statistical power**

133 Power calculations were performed using the online tool mRnd (<http://cnsgenomics.com/shiny/mRnd/>) as  
134 described previously[44]. The statistical power to detect a range of odds ratios (ORs) (1.05, 1.1, 1.2, 1.3, 1.4,  
135 and 1.5 or their respective inverse) per SD change in  $\log_{10}$  serum folate levels given the sample size in each  
136 cancer GWAS, a type 1 error of 5%, and a total variance explained by the instruments of 5% (see below), are  
137 given in Supplementary Table S3.

138 The number of cancer cases ranged from 1,277 for ovarian cancer in UKBB to 122,977 for breast cancer in  
139 BCAC. We had >80% power to detect modest effect sizes (OR 1.1 or its inverse 0.9) in our MR analysis for  
140 consortia studies of cancer of the breast (BCAC), prostate (PRACTICAL), and colorectum (GECCO-CORECT-  
141 CCFR) cancers as well as pan-cancers from UKBB. We had a lower power to detect an OR of 1.1 for the consortia  
142 studies of ovarian (OCAC, 77%) and lung (ILCCO, 42%) cancers. For UKBB, where cases were not enriched  
143 within the dataset, power to detect an OR of 1.1 ranged from 13% to 100%. Supplementary Table S3 describes  
144 the sample sizes for each cancer study along with power to detect a range of OR including retrospective power  
145 to detect the reported MR ORs.

146 Analyses were conducted in R software version 3.5.1 using TwoSampleMR and MRInstruments[22],  
147 MendelianRandomization[45], meta, and metafor R packages. All reported P-values are two-tailed.

148

## 149 **Results**

150 Table 1 describes the associations for each SNP comprising our instrument with serum folate, after rescaling  
151 to the SD scale. In total, the genetic instruments explained 4.9% of the variance in serum folate levels. The  
152 corresponding F-statistic (113.8) suggests that weak instrument bias was unlikely[39].

### 153 **Mendelian randomisation estimates for the association between serum folate and cancer**

154 Our Mendelian randomisation effect estimates showed consistent inverse relationships for all cancer  
155 outcomes (except colorectal cancer) using both the IVW method and the likelihood-based approach. As effect  
156 estimates were very similar between the IVW method and the likelihood-based approach, all subsequent  
157 analyses utilise the IVW estimates. Together, the MR effect estimates confer a possible protective effect of  
158 increasing serum folate on the risk of cancers. In contrast, the colorectal cancer causal estimates suggest  
159 increasing risk with increasing serum folate. These results were concordant between those of the consortia  
160 studies and UKBB. However, our estimates are imprecise with 95% confidence intervals crossing the null  
161 suggesting that there was little evidence of causal associations (Table 2).

162 Overall, there was little evidence of heterogeneity using the Cochran's Q statistic between effect estimates  
163 for each of the three serum folate SNPs (P-value for heterogeneity >0.1) in our MR analyses. This is with the  
164 exception of breast cancer in UKBB (P-value for heterogeneity 0.03) and colorectal cancer in GECCO-CORECT-  
165 CCFR (P-value for heterogeneity 0.002) (Table 2). Random effects IVW and likelihood approach is reported for  
166 these two cancers. Supplementary Figure S1 show scatter plots of associations between serum folate SNPs  
167 and the risk of each of the cancer studies analysed. Results for individual single SNP MR analysis (using Wald  
168 ratios) are provided in Supplementary Table S4. There no strong evidence for causal associations between any  
169 of the individual SNPs and cancer. Overall, effect estimates were concordant with that of the IVW MR analysis.



170 Figure 1 shows a forest plot depicting our MR causal estimates for each cancer study as well as the pooled  
171 effects using fixed-effects IVW meta-analysis for breast, prostate, ovarian, lung and colorectal cancer. Pooled  
172 estimates were concordant in magnitude and direction of effect to those of the individual studies, conferring  
173 a protective effect on the risk of cancer with increasing serum folate. Again, there was little evidence of causal  
174 associations with confidence intervals crossing the null. In addition, there was little evidence of heterogeneity  
175 between the studies in each meta-analysis (P-value for heterogeneity >0.6). Supplementary Table S5 gives  
176 meta-analysis causal estimates and between-study heterogeneity results.

### 177 **Sensitivity analyses and evaluation of Mendelian randomisation assumptions**

178 After look-up within the MR-Base PheWAS database, we found some evidence from GWAS that the three SNPs  
179 were associated with additional phenotypes at genome-wide significance (P-value <1x10<sup>-5</sup>) (Supplementary  
180 Table S6). All three SNPs were associated with blood cell traits; rs1801133 is associated with mean corpuscular  
181 haemoglobin, mean corpuscular volume, plateletcrit (a measure of total platelet mass), and red cell  
182 distribution width[46]. Whilst rs7545014 and rs1999594 are associated with plateletcrit and platelet  
183 count[46]. In addition, rs1801133 is associated with several vascular phenotypes including diastolic blood  
184 pressure and hypertension in UKBB as well as birthweight of first child and hip circumference. Rs1999594 is  
185 additionally associated with diastolic blood pressure and rs7545014 is associated with the operative procedure  
186 to excise umbilicus; both within UKBB.

187 Leave-one-out analysis suggests that it is unlikely that any individual SNP was driving the IVW MR results we  
188 report as shown by the forest plot illustrated in Supplementary Figure S2. Except for colorectal cancer, all  
189 leave-one-out analyses were concordant in direction and strength of effect.

190

## 191 **Discussion**

192 We found no strong evidence that genetically increasing serum folate was causally associated with pan-cancer  
193 and six site-specific cancers. Although we found little evidence of causal associations, the MR effect estimates  
194 tended towards those of being protective for cancer risk with increasing serum folate levels.

### 195 **Breast cancer**

196 In line with our findings for breast cancer, the latest WCRF-CUP reported little evidence of associations  
197 between folate intake and breast cancer risk[47]. The WCRF-CUP aimed to systematically review and meta-  
198 analyse observational studies and RCTs associating nutritional risk factors with site-specific cancers. In the  
199 meta-analysis of 19,251 breast cancer cases, dietary folate intake was not reported to be associated with  
200 cancer risk (risk ratio (RR) per 50 µg/day, 0.99; 95% CI 0.98-1.01). Likewise, results from the meta-analysis of  
201 6,094 cases associating total folate intake with breast cancer also reported no evidence of association (RR  
202 1.01; 95% CI 0.96-1.06)[47]. Subsequent meta-analyses have also reported concordant results to those  
203 reported in our MR study. The European Prospective Investigation into Cancer and Nutrition (EPIC) cohort  
204 recently reported protective effects of plasma folate on the risk of breast cancer albeit with little statistical  
205 evidence (OR 0.93; 95% CI 0.83-1.05)[48].

206 A recent systematic review and meta-analysis have demonstrated a U-shaped dose-effect relationship  
207 between dietary folate intake and breast cancer risk in prospective studies. Daily intake of folate between 153  
208 and 400 µg showed a reduced breast cancer risk compared to those with low folate intake (<153 µg), but not  
209 for those >400 µg[49]. We were unable to explore potential non-linear relationships within our MR study  
210 owing to lack of individual-level data.

211 More recently, authors included within our study published findings for an MR of circulating concentrations  
212 of micro-nutrients and risk of breast cancer using data from BCAC[50]. Serum folate was included in an MR of  
213 breast cancer risk using instruments identified from Garup *et al.*[25]. In common with our study, SNP  
214 rs1801133 was included within the serum folate instrument. Per 1 SD increase in serum folate (nmol/L), the  
215 authors reported an OR 1.06 (95% CI 0.94-1.20). The effect estimates are at odds with those we have  
216 presented (OR 0.94; 95% CI 0.78-1.12). However, both are imprecise and have confidence intervals that  
217 overlap. When comparing the causal effect estimates of rs1801133; the SNP in common with both studies; we  
218 see a more comparative causal estimate (OR 1.03; 95% CI 0.89-1.18 Papadimitriou *et al.*[50] vs. OR 1.04; 95%  
219 CI 0.82-1.26). It is important to note that our MR study reports causal effect estimates per 1 SD increase in  
220  $\log_{10}$  serum folate (nmol/L) while the estimates for Papadimitriou *et al.* are reported per 1 SD increase in serum  
221 folate on the natural scale (nmol/L).

## 222 Prostate cancer

223 Several studies have focused on the associations between serum folate and prostate cancer and have been  
224 meta-analysed by the WCRF-CUP, which reported no evidence of a dose-response relationship in 7 prospective  
225 and nested case-control studies (5,938 cases) (RR 1.01 per 5 nmol/L; 95% CI 1.00-1.02)[47]. These adverse  
226 effect estimates contrast with the protective ORs reported in our MR study, although the observational effect  
227 estimate overlaps the MR confidence interval and both studies show little evidence of association.

228 More recent studies are inconsistent. In a pooled analysis of 23 case-control studies, the *MTHFR* C677T variant  
229 rs1801133 was found to be protective against prostate cancer (OR per each additional T allele, 0.83; 95% CI  
230 0.70-1.02) albeit with a wide confidence interval that included a possibly harmful effect [51]. The suggested  
231 protective effect of the folate reducing 677TT allele runs counter to our MR study whereby each additional C  
232 allele (the folate increasing allele) confers a protective effect of similar magnitude (OR 0.87, see Figure 1). In  
233 a pooled nested case-control study (6,875 cases, average follow-up of 8.9 years) higher serum folate was  
234 associated with increased risk of prostate cancer (OR 1.13; 95% CI 1.02-1.26)[13], while other meta-analyses  
235 of folate intake and prostate cancer risk find no associations but do report protective effects in line with our  
236 MR study (OR 0.97; 95%CI 0.89-1.06)[14]. However, the same publication also reports strong observational  
237 evidence of positive associations between serum folate and prostate cancer (OR 1.43; 95%CI 1.06-1.93), in  
238 contrast to our causal analyses[14].

## 239 Colorectal cancer

240 In our study, colorectal cancer was the only site-specific cancer to suggest increased risk with increasing serum  
241 folate, albeit with a wide confidence interval that included a possible protective effect. A 2018 systematic  
242 review[52] reported little evidence of an effect of folic acid supplementation on colorectal cancer risk in a  
243 meta-analysis of RCTs (OR 1.07; 95%CI 0.86-1.14) with effect estimates similar in magnitude to those reported  
244 in our MR analysis. For observational studies, the WCRF-CUP meta-analysed 10 studies (6,986 cases) which  
245 examined the association between dietary folate and colorectal cancer reporting a null relationship (RR 0.99  
246 per 200  $\mu\text{g}/\text{day}$ ; 95% CI 0.96-1.02)[47]. A large, recent meta-analysis (24,816 cases) reported a reduced  
247 colorectal cancer risk when comparing highest (median, > 441  $\mu\text{g}/\text{day}$ ) with lowest (median, 212  $\mu\text{g}/\text{day}$ ) folate  
248 intake (RR 0.88; 95% CI 0.81-0.95)[17]. Using genetic studies, a meta-analysis of 67 studies reported strong  
249 evidence of association between the *MTHFR* 677TT genotype (which results in lower serum folate) and lower  
250 colorectal cancer risk under conditions of high folate intake[53].

## 251 Ovarian cancer

252 Studies exploring the relationships between folate and risk of ovarian cancer are few. The WCRF-CUP, which  
253 was last updated in 2013, reported no significant associations between dietary folate and ovarian cancer in a



254 dose-response meta-analysis (1,158 cases) (RR 0.96; 95% CI 0.88-1.05)[47]. These results are in line with the  
255 weakly protective MR results.

### 256 **Lung cancer**

257 In line with our MR results, the WCRF-CUP reported no significant associations between dietary folate intake  
258 and lung cancer risk in a dose-response meta-analysis of 9 studies (4,900 cases) (RR 0.99; 95% CI 0.95-  
259 1.02)[47]. The report also described possible U-shaped relationships between dietary folate and lung cancer  
260 (P-value < 0.01)[47]. A 2014 meta-analysis of 5 RCTs also found no evidence of associations between folic acid  
261 supplementation and lung cancer incidence (RR 1.00; 95% CI 0.84-1.21)[54].

### 262 **Malignant melanoma**

263 Epidemiological studies relating folate and malignant melanoma risk are limited. An inverse relationship was  
264 reported for a meta-analysis of three RCTs evaluating treatment with combined supplements, including folic  
265 acid and risk for malignant melanomas (RR 0.47; 95% CI 0.23-0.94) with similar magnitudes of effect to our  
266 current MR study. However, the sample size for this analysis was very small (38 malignant melanoma  
267 cases)[55]. A meta-analysis of 13 RCTs found no association between folic acid supplementation and malignant  
268 melanoma, though results were limited by low number of cases (N = 126) and a relatively short follow up  
269 period (average 5.2 years)[19]. More recently, a large meta-analysis of prospective cohorts reported a modest  
270 increased risk of malignant melanoma (1,328 cases over a 26-year follow-up) for folate intake from food only  
271 (HR 1.36; 95% CI 1.13-1.64), though this did not replicate when looking at total folate intake[56].

### 272 **Pan-cancer**

273 Most studies published to date have focused on site-specific cancers. In this study, we have performed a  
274 genome-wide association analysis for pan-cancers. This allowed us to appraise the impact of folate on cancer  
275 risk across all sites in the general population. Proposed mechanisms for the formation of cancer via folate  
276 stems from the effects of perturbation of the one-carbon metabolism pathway effects of methylation and  
277 DNA repair and synthesis mechanisms which are common to the pathogenesis of many cancers[57]. However,  
278 we found little evidence of causal associations with pan-cancer, although the effect estimates were protective  
279 and of similar magnitude to those of the site-specific cancers. Likewise, a recent pooled analysis of RCTs  
280 showed that folic acid supplements had little effect on the risk of total cancer incidence (RR 1.06; 95% CI 0.99-  
281 1.13)[19]. The number of cancer cases was modest (3,713 cases) and the mean follow-up time for included  
282 studies was five years, limiting conclusions of long-term impacts of folic acid supplementation.

283 In cancer treatment, antifolates are key compounds which inhibit enzymes in the folate metabolic pathway  
284 disrupting tumour growth and progression[58]. Due to the high proliferation of cells and demand for DNA,  
285 increasing levels of folate may promote the growth of precursor or established tumours in animal  
286 models[18,59]. Conversely, in normal tissues, insufficient folate levels may impair DNA replication and repair,  
287 providing possible mechanisms for the initiation of cancer through gene mutation and chromosomal  
288 aberrations. Indeed, administration of folate has shown to reverse these effects[60]. This may support the  
289 general findings of protective effect estimates as reported for the multiple cancers within this MR study and  
290 in previously published studies. The role of folate in cancer treatment strategies, as well as the proposed  
291 mechanisms for carcinogenesis and progression, suggests that potential associations between folate and  
292 cancer may not be in terms of risk per se, but rather in progression and survival.

293 Folate intake has been reported to have a protective effect in cancers at sites not included in this current  
294 study, including oral cavity and pharyngeal cancer, bladder, oesophageal, and pancreatic cancer[18]. Further  
295 work is needed to establish extensive well-powered publicly available GWAS data in order to elucidate the  
296 causal effects on these cancers, which is outside the scope of this current study.

297 **Strengths and limitations**

298 This study's major strength is the use of two-sample MR, which is less prone to biases from confounding,  
299 reverse causation and measurement error that is seen in observational studies using directly measured  
300 phenotypes. Observational studies have tended to focus on dietary and/or supplement intake of folic acid  
301 using methods such as food frequency questionnaire and diet diaries. These methods have inherent limitations  
302 such as recall bias and insufficient food composition tables leading to measurement error. Although a genetic  
303 proxy of an exposure provides a more objective means with which to assess a causal relationship; measurement  
304 error such as that described above can bias the causal estimates. In our study, we used genetic proxies for  
305 serum folate level. Circulating biomarkers provide a more proximal measure of nutrition status and is more  
306 objectively measured[61].

307 Several important factors should ideally be met for instruments to be considered robust. One factor is that  
308 variants have a biologically plausible relationship to the exposure (though this is not mandatory), i.e. located  
309 at or near genes with established pathways relevant to the exposure. The lead GWAS SNP rs1801133  
310 (C667T;A222V) resides within the Methylene tetrahydrofolate reductase (*MTHFR*) gene, reduces *MTHFR*  
311 activity and increases its thermolability, in turn lowering serum folate levels, particularly in individuals with low  
312 dietary folate intake[62]. This satisfies the criteria of biological plausibility and thus strengthens the robustness  
313 of our serum folate instrument. A second factor to consider is that multiple independent variants from  
314 different loci that affect the exposure independently should be used to allow for formal tests of violations of  
315 instrumental variable assumptions. With so few SNPs identified as instruments for serum folate, we were  
316 unable to satisfy this criterion.

317 Further strengths were the ability to additionally perform GWAS in the UKBB enabling a comparison of  
318 population cohort effect estimates with those of case ascertained consortia studies and ultimately allowing  
319 meta-analysis, further increasing statistical power to detect modest effect estimates.

320 We also have several limitations that impact our interpretation of findings. We were unable to extend our  
321 analysis to allow for stratified analyses by factors of interest such as alcohol intake, BMI, sex, age, menopausal  
322 status and smoking. Our causal estimators assumed a linear relationship, and we were also unable to test for  
323 deviations from this. Several methods have recently been developed to explore non-linear relationships  
324 within an MR framework; however, these approaches are underpowered and require access to individual-  
325 level data[63].

326 We had greater than 90% power to detect our reported MR ORs for breast, prostate, ovarian, lung and  
327 colorectal cancer in the consortia GWAS meta-analysis datasets. However, we had lower power for the cancers  
328 appraised using UKBB. Where possible, we performed meta-analysis within each site-specific cancer; which  
329 increases statistical power; but we may still be underpowered to detect clinically relevant but smaller  
330 magnitude effects. Furthermore, statistical power in MR is dependant on the amount of variance in the  
331 exposure variable explained by the genetic variants. The three SNPs within our MR were in weak LD with each  
332 other; therefore, it is likely that the variance explained is lower than that of the sum of the three SNPs ( $R^2$  5%).  
333 Further work to identify additional SNPs robustly associated with serum folate in larger GWAS and meta-  
334 analysis will go some way to improving statistical power.

335 The SNPs included in our instrument were found to be associated with vascular traits, and cell and platelet  
336 measures in MR-Base PheWAS. Grarup *et al.*[25] conducted GWAS of serum folate in an Icelandic population  
337 and evaluated possible pleiotropic effects by screening their database of common disease and risk factors.  
338 rs1801133 was found to be associated with thoracic aortic aneurysm, though this is unlikely to affect the risk  
339 of cancer. Previous studies have reported associations between folate and vascular traits[64] as well as  
340 between vascular traits and cancer risk[65,66]. The serum folate instruments used in our MR are located within

341 or near the *MTHFR* gene, which is directly involved in the one-carbon metabolism pathway. This suggests that  
342 the associations with vascular traits could reflect the downstream effects of folate on cancer rather than  
343 pleiotropic effects. Though there is no compelling evidence, we cannot rule out the possibility of associations  
344 with potential confounders or the presence of pleiotropy.

345 This study was conducted in European populations and so may not be generalisable to other populations. Both  
346 the Republic of Ireland and the UK voluntarily fortify cereals, which may help reduce the prevalence of folate-  
347 deficient individuals. Further work may be needed to explore causal effects in populations in which both  
348 samples (sample 1 and sample 2) included in the MR analyses derive from countries with no such voluntary or  
349 mandatory fortification of food items.

## 350 **Conclusions**

351 We found little evidence of causal associations between genetically increasing serum folate levels and the risk  
352 of pan-cancer, and cancer of the breast, prostate, ovaries, lung, colorectum; and malignant melanoma. Further  
353 work is needed to replicate our findings, strengthen the folate instrumental variable, and explore causal  
354 associations in the risk of cancer subtypes. The focus of this study was on the risk in developing cancer;  
355 however, the use of antifolates in cancer treatments and reported associations of folate supplementation and  
356 tumour-progression lends itself to further exploration of causal effects in cancer prognosis and mortality. In  
357 combination with existing literature, our results provide evidence that widespread supplementation or  
358 deregulation of fortification of foods with folic acid will not lead to an unintended population-wide increase  
359 in cancer risk.

360

## 361 **Funding**

362 This work was supported by a grant awarded to SJL by the World Cancer Research Fund International (WCRF  
363 2015/1421), a Cancer Research UK program grant (C18281/A19169) and the National Institute for Health  
364 Research (NIHR) Bristol Biomedical Research Centre. PH is supported by CRUK Population Research  
365 Postdoctoral Fellowship (C52724/A20138). KKT was supported by the World Cancer Research Fund (WCRF  
366 UK), as part of the World Cancer Research Fund International grant programme (WCRF 2014/1180).

367 The funders played no role in the design, implementation, analysis, or interpretation of the data in this study.

## 368 **Acknowledgements**

369 The authors would like to thank the participants of the individual studies contributing to BCAC, PRACTICAL,  
370 OCAC, ILCCO, GECCO-CORECT-CCFR, and UKBB for their participation in these studies along with the principal  
371 investigators for generating the data and for making these data available or available within the public domain.

372 The authors would also like to thank Professor Barry Shane and Dr. Faith Pangilinan; authors of the study from  
373 which we defined our genetic instrument; for responding to our queries and providing additional information  
374 on data used within this manuscript.

375 Finally, we would like to thank our colleagues James Yarmolinsky, Dr. Caroline Bull, Dr. Vanessa Tan, Dr. Tom  
376 Dudding, and Dr. Timothy Robinson for their contributions towards defining cancer outcomes in UKBB.

## 377 **Contributors**

378 SJL, RMM and KB conceived and designed the study. KB conducted the analyses. KB wrote the manuscript  
379 with input from all authors. Correspondence and material requests should be addressed to KB

380 (Kimberley.burrows@bristol.ac.uk).

381

382 **Declaration of interests**

383 None

## 384 Tables

385 Table 1 Genetic variants included in the instrumental variable and their associations with serum folate

| Variant   | chr:pos    | Locus     | Alleles |       | EAF  | Per-allele estimate |                 |          | R <sup>2</sup> |
|-----------|------------|-----------|---------|-------|------|---------------------|-----------------|----------|----------------|
|           |            |           | Effect  | Other |      | Beta <sup>ab</sup>  | SE <sup>b</sup> | P-value  |                |
| rs1801133 | 1:11778965 | MTHFR     | C       | T     | 0.66 | 0.062               | 0.009           | 2.82E-11 | 0.020          |
| rs7545014 | 1:11857240 | LOC390997 | C       | T     | 0.56 | 0.050               | 0.009           | 1.01E-08 | 0.015          |
| rs1999594 | 1:11881803 | RNU5E     | T       | C     | 0.45 | 0.050               | 0.009           | 1.43E-08 | 0.014          |

386 chr, chromosome; pos, position (Build 38); Locus, nearest gene reported [Shane et al. 2017]; EAF, effect allele frequency where the effect allele is the folate increasing allele;  
 387 SE, standard error; MTHFR, Methylene tetrahydrofolate Reductase; LOC390997, SET Binding Factor 1 Pseudogene; RNU5E, RNA-U5E Small Nuclear 1; R<sup>2</sup>, proportion of variance  
 388 explained; <sup>a</sup> Linear regression adjusted for age and sex; <sup>b</sup> Regression coefficients were re-scaled to represent SD change per each additional effect allele.

389

390 Table 2 Mendelian randomisation estimates between genetically increasing serum folate and risk of cancer

| Cancer type        | Study     | Inverse variance weighted estimate |       |       |         | Maximum likelihood estimate |       |       |         | Q      | P <sub>het</sub> |
|--------------------|-----------|------------------------------------|-------|-------|---------|-----------------------------|-------|-------|---------|--------|------------------|
|                    |           | OR                                 | LCI   | UCI   | P-value | OR                          | LCI   | UCI   | P-value |        |                  |
| <b>Pan-cancers</b> | UKBB      | 0.858                              | 0.713 | 1.033 | 0.106   | 0.856                       | 0.707 | 1.036 | 0.110   | 1.297  | 0.523            |
| <b>Breast</b>      | BCAC      | 0.938                              | 0.784 | 1.123 | 0.489   | 0.936                       | 0.778 | 1.125 | 0.480   | 2.871  | 0.238            |
|                    | UKBB*     | 0.837                              | 0.445 | 1.575 | 0.582   | 0.820                       | 0.421 | 1.600 | 0.561   | 6.839  | 0.033            |
| <b>Prostate</b>    | PRACTICAL | 0.859                              | 0.681 | 1.085 | 0.202   | 0.850                       | 0.666 | 1.085 | 0.193   | 4.206  | 0.122            |
|                    | UKBB      | 0.889                              | 0.581 | 1.361 | 0.589   | 0.886                       | 0.575 | 1.366 | 0.584   | 1.829  | 0.401            |
| <b>Ovarian</b>     | OCAC      | 0.862                              | 0.593 | 1.255 | 0.439   | 0.860                       | 0.587 | 1.258 | 0.437   | 1.351  | 0.509            |
|                    | UKBB      | 0.969                              | 0.318 | 2.954 | 0.956   | 0.968                       | 0.310 | 3.020 | 0.955   | 2.586  | 0.275            |
| <b>Lung</b>        | ILCCO     | 0.810                              | 0.488 | 1.344 | 0.415   | 0.809                       | 0.486 | 1.348 | 0.416   | 0.376  | 0.829            |
|                    | UKBB      | 1.045                              | 0.484 | 2.253 | 0.911   | 1.046                       | 0.479 | 2.288 | 0.910   | 2.227  | 0.329            |
| <b>Colorectal</b>  | GECCO*    | 1.177                              | 0.635 | 2.181 | 0.605   | 1.223                       | 0.614 | 2.435 | 0.567   | 12.568 | 0.002            |
|                    | UKBB      | 1.326                              | 0.781 | 2.252 | 0.296   | 1.330                       | 0.778 | 2.273 | 0.298   | 0.577  | 0.749            |
| <b>Melanoma</b>    | UKBB      | 0.557                              | 0.295 | 1.053 | 0.072   | 0.555                       | 0.288 | 1.069 | 0.078   | 0.404  | 0.817            |

391 OR, odds ratio; LCI, lower 95% confidence interval; UCI, upper 95% confidence interval; Cochran's Q and P<sub>het</sub> is the P-value for heterogeneity between instrumented SNP causal  
 392 estimates in the IVW analysis; OR and 95% CI reflect the casual risk estimate of cancer per genetically determined standard deviation increase in serum folate; \* causal  
 393 estimators are derived using random effects for both IVW and maximum likelihood models.

## 394 Figures

395 *Figure 1 Forest Plot of Mendelian randomisation causal association estimates between serum folate and cancers*

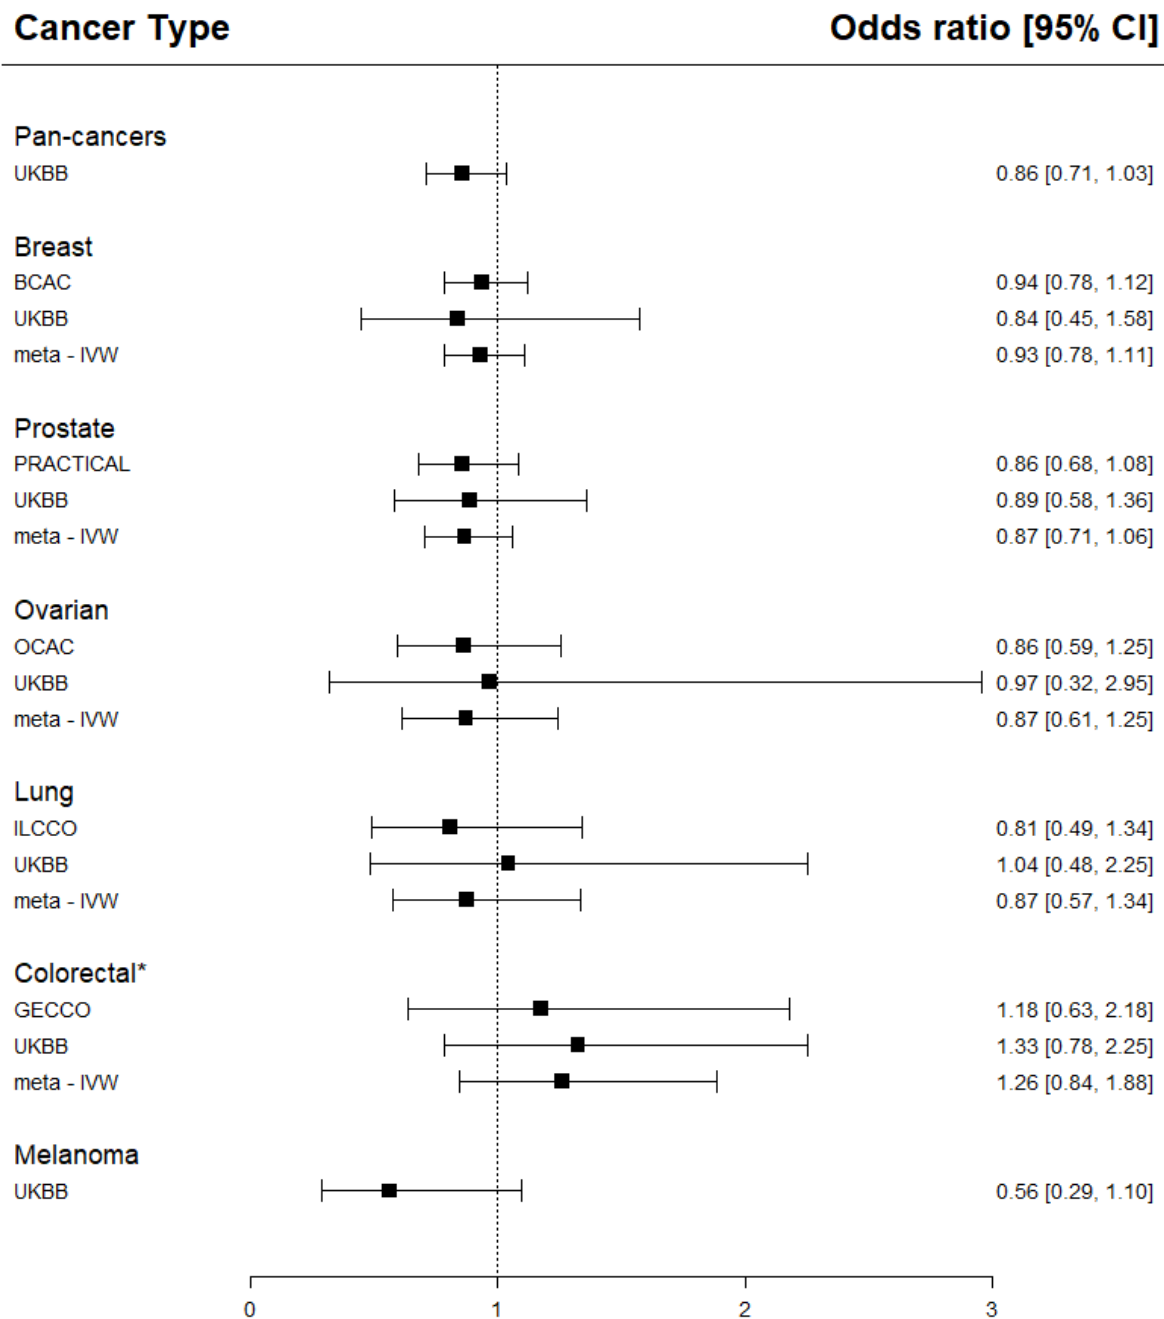

396

397 *The odds ratios (OR) were derived using the inverse variance weighted method and correspond to a 1 SD increase in log<sub>10</sub>*  
 398 *serum folate levels. Meta – IVW correspond to the fixed effects IVW meta-analysis results; \* there will be over precision*  
 399 *in the IVW meta-analysis estimate as a sub-sample of UKBB (7% of the UKBB MR sample) was included in the GECCO-*  
 400 *CORECT-CCFR colorectal GWAS meta-analysis.*

401



## 402 References

- 403 1 Ganji V, Kafai MR. Trends in Serum Folate, RBC Folate, and Circulating Total Homocysteine  
404 Concentrations in the United States: Analysis of Data from National Health and Nutrition Examination  
405 Surveys, 1988–1994, 1999–2000, and 2001–2002. *J Nutr* 2006;**136**:153–8. doi:10.1093/jn/136.1.153
- 406 2 Wald NJ, Morris JK, Blakemore C. Public health failure in the prevention of neural tube defects: time to  
407 abandon the tolerable upper intake level of folate. *Public Health Rev* 2018;**39**:2. doi:10.1186/s40985-  
408 018-0079-6
- 409 3 Public Health England; GOV.UK. Folic acid: updated SACN recommendations - GOV.UK. 2017.  
410 <https://www.gov.uk/government/publications/folic-acid-updated-sacn-recommendations> (accessed  
411 10 May 2018).
- 412 4 Selhub J. Folate, vitamin B12 and vitamin B6 and one carbon metabolism. *J Nutr Health Aging* 2002.
- 413 5 Gomes S, Lopes C, Pinto E. Folate and folic acid in the periconceptual period: recommendations from  
414 official health organizations in thirty-six countries worldwide and WHO. *Public Health Nutr*  
415 2016;**19**:176–89. doi:10.1017/S1368980015000555
- 416 6 De-Regil LM, Peña-Rosas JP, Fernández-Gaxiola AC, *et al.* Effects and safety of periconceptual oral  
417 folate supplementation for preventing birth defects. *Cochrane Database Syst. Rev.* 2015.  
418 doi:10.1002/14651858.CD007950.pub3
- 419 7 Odewole OA, Williamson RS, Zakai NA, *et al.* Near-elimination of folate-deficiency anemia by  
420 mandatory folic acid fortification in older US adults: Reasons for Geographic and Racial Differences in  
421 Stroke study 2003–2007. *Am J Clin Nutr* 2013;**98**:1042–7. doi:10.3945/ajcn.113.059683
- 422 8 Kim Y-I. Folate and DNA methylation: a mechanistic link between folate deficiency and colorectal  
423 cancer? *Cancer Epidemiol Biomarkers Prev* 2004;**13**:511–  
424 9.<http://www.ncbi.nlm.nih.gov/pubmed/15066913> (accessed 26 Jul 2019).
- 425 9 Miller JW, Borowsky AD, Marple TC, *et al.* Folate, DNA methylation, and mouse models of breast  
426 tumorigenesis. In: *Nutrition Reviews*. 2008. doi:10.1111/j.1753-4887.2008.00070.x
- 427 10 Larsson SC, Giovannucci E, Wolk A. Folate and Risk of Breast Cancer: A Meta-analysis. *JNCI J Natl Cancer*  
428 *Inst* 2007;**99**:64–76. doi:10.1093/jnci/djk006
- 429 11 Liu M, Cui L-H, Ma A-G, *et al.* Lack of effects of dietary folate intake on risk of breast cancer: an updated  
430 meta-analysis of prospective studies. *Asian Pac J Cancer Prev* 2014;**15**:2323–8.  
431 doi:10.7314/apjcp.2014.15.5.2323
- 432 12 Chen P, Li C, Li X, *et al.* Higher dietary folate intake reduces the breast cancer risk: a systematic review  
433 and meta-analysis. *Br J Cancer* 2014;**110**:2327–38. doi:10.1038/bjc.2014.155
- 434 13 Price AJ, Travis RC, Appleby PN, *et al.* Circulating Folate and Vitamin B 12 and Risk of Prostate Cancer:  
435 A Collaborative Analysis of Individual Participant Data from Six Cohorts Including 6875 Cases and 8104  
436 Controls. *Eur Urol* 2016;**70**:941–51. doi:10.1016/j.eururo.2016.03.029
- 437 14 Tio M, Andrici J, Cox MR, *et al.* Folate intake and the risk of prostate cancer: a systematic review and  
438 meta-analysis. *Prostate Cancer Prostatic Dis* 2014;**17**:213–9. doi:10.1038/pcan.2014.16
- 439 15 Wang R, Zheng Y, Huang J-Y, *et al.* Folate intake, serum folate levels, and prostate cancer risk: a meta-  
440 analysis of prospective studies. *BMC Public Health* 2014;**14**:1326. doi:10.1186/1471-2458-14-1326
- 441 16 Kim D-H, Smith-Warner SA, Spiegelman D, *et al.* Pooled analyses of 13 prospective cohort studies on  
442 folate intake and colon cancer. *Cancer Causes Control* 2010;**21**:1919–30. doi:10.1007/s10552-010-  
443 9620-8

- 444 17 Liu Y, Yu Q, Zhu Z, *et al.* Vitamin and multiple-vitamin supplement intake and incidence of colorectal  
445 cancer: a meta-analysis of cohort studies. *Med Oncol* 2015;**32**:434. doi:10.1007/s12032-014-0434-5
- 446 18 Pieroth R, Paver S, Day S, *et al.* Folate and Its Impact on Cancer Risk. *Curr. Nutr. Rep.* 2018.  
447 doi:10.1007/s13668-018-0237-y
- 448 19 Vollset SE, Clarke R, Lewington S, *et al.* Effects of folic acid supplementation on overall and site-specific  
449 cancer incidence during the randomised trials: meta-analyses of data on 50,000 individuals. *Lancet*  
450 (*London, England*) 2013;**381**:1029–36. doi:10.1016/S0140-6736(12)62001-7
- 451 20 Smith GD, Ebrahim S. What can mendelian randomisation tell us about modifiable behavioural and  
452 environmental exposures? *BMJ* 2005;**330**:1076–9. doi:10.1136/bmj.330.7499.1076
- 453 21 Davies NM, Holmes M V., Davey Smith G. Reading Mendelian randomisation studies: A guide, glossary,  
454 and checklist for clinicians. *BMJ* Published Online First: 2018. doi:10.1136/bmj.k601
- 455 22 Hemani G, Zheng J, Elsworth B, *et al.* The MR-Base platform supports systematic causal inference across  
456 the human phenome. *Elife* 2018;**7**:e34408. doi:10.7554/eLife.34408
- 457 23 Shane B, Pangilinan F, Mills JL, *et al.* The 677C→T variant of MTHFR is the major genetic modifier of  
458 biomarkers of folate status in a young, healthy Irish population. *Am J Clin Nutr* 2018;**108**:1334–41.  
459 doi:10.1093/ajcn/nqy209
- 460 24 Tanaka T, Scheet P, Giusti B, *et al.* Genome-wide Association Study of Vitamin B6, Vitamin B12, Folate,  
461 and Homocysteine Blood Concentrations. *Am J Hum Genet* 2009;**84**:477–82.  
462 doi:10.1016/j.ajhg.2009.02.011
- 463 25 Grarup N, Sulem P, Sandholt CH, *et al.* Genetic Architecture of Vitamin B12 and Folate Levels Uncovered  
464 Applying Deeply Sequenced Large Datasets. *PLoS Genet* 2013;**9**:e1003530.  
465 doi:10.1371/journal.pgen.1003530
- 466 26 Cawley S, McCartney D, Woodside J V, *et al.* Optimization of folic acid supplementation in the  
467 prevention of neural tube defects. *J Public Health (Bangkok)* 2017;**40**:1–8. doi:10.1093/pubmed/fdx137
- 468 27 Michailidou K, Lindström S, Dennis J, *et al.* Association analysis identifies 65 new breast cancer risk loci.  
469 *Nature* 2017;**551**:92–4. doi:10.1038/nature24284
- 470 28 Schumacher FR, Al Olama AA, Berndt SI, *et al.* Association analyses of more than 140,000 men identify  
471 63 new prostate cancer susceptibility loci. *Nat Genet* 2018;**50**:928–36. doi:10.1038/s41588-018-0142-  
472 8
- 473 29 Phelan CM, Kuchenbaecker KB, Tyrer JP, *et al.* Identification of 12 new susceptibility loci for different  
474 histotypes of epithelial ovarian cancer. *Nat Genet* 2017;**49**:680–91. doi:10.1038/ng.3826
- 475 30 Wang Y, McKay JD, Rafnar T, *et al.* Rare variants of large effect in BRCA2 and CHEK2 affect risk of lung  
476 cancer. *Nat Genet* 2014;**46**:736–41. doi:10.1038/ng.3002
- 477 31 Huyghe JR, Bien SA, Harrison TA, *et al.* Discovery of common and rare genetic risk variants for colorectal  
478 cancer. *Nat Genet* 2019;**51**:76–87. doi:10.1038/s41588-018-0286-6
- 479 32 Fry A, Littlejohns TJ, Sudlow C, *et al.* Comparison of Sociodemographic and Health-Related  
480 Characteristics of UK Biobank Participants With Those of the General Population. *Am J Epidemiol*  
481 2017;**186**:1026–34. doi:10.1093/aje/kwx246
- 482 33 Bycroft C, Freeman C, Petkova D, *et al.* Genome-wide genetic data on ~500,000 UK Biobank  
483 participants. *bioRxiv* 2017;:166298. doi:10.1101/166298
- 484 34 Davey Smith G, Hemani G. Mendelian randomization: genetic anchors for causal inference in

- 485 epidemiological studies. *Hum Mol Genet* 2014;**23**:R89–98. doi:10.1093/hmg/ddu328
- 486 35 Burgess S, Scott RA, Timpson NJ, *et al.* Using published data in Mendelian randomization: a blueprint  
487 for efficient identification of causal risk factors. *Eur J Epidemiol* 2015;**30**:543–52. doi:10.1007/s10654-  
488 015-0011-z
- 489 36 Burgess S, Dudbridge F, Thompson SG. Combining information on multiple instrumental variables in  
490 Mendelian randomization: comparison of allele score and summarized data methods. *Stat Med*  
491 2016;**35**:1880–906. doi:10.1002/sim.6835
- 492 37 Gibbs RA, Boerwinkle E, Doddapaneni H, *et al.* A global reference for human genetic variation. *Nature*  
493 2015;**526**:68–74. doi:10.1038/nature15393
- 494 38 Davies NM, Holmes M V, Davey Smith G. Reading Mendelian randomisation studies: a guide, glossary,  
495 and checklist for clinicians. *BMJ* 2018;**362**:k601. doi:10.1136/bmj.k601
- 496 39 Burgess S, Thompson SG, CRP CHD Genetics Collaboration. Avoiding bias from weak instruments in  
497 Mendelian randomization studies. *Int J Epidemiol* 2011;**40**:755–64. doi:10.1093/ije/dyr036
- 498 40 Greco M F Del, Minelli C, Sheehan NA, *et al.* Detecting pleiotropy in Mendelian randomisation studies  
499 with summary data and a continuous outcome. *Stat Med* 2015;**34**:2926–40. doi:10.1002/sim.6522
- 500 41 Bowden J, Del Greco M F, Minelli C, *et al.* A framework for the investigation of pleiotropy in two-sample  
501 summary data Mendelian randomization. *Stat Med* 2017;**36**:1783–802. doi:10.1002/sim.7221
- 502 42 Pierce BL, Burgess S. Efficient Design for Mendelian Randomization Studies: Subsample and 2-Sample  
503 Instrumental Variable Estimators. *Am J Epidemiol* 2013;**178**:1177–84. doi:10.1093/aje/kwt084
- 504 43 Thomas DC, Lawlor DA, Thompson JR. Re: Estimation of Bias in Nongenetic Observational Studies Using  
505 “Mendelian Triangulation” by Bautista *et al.* *Ann Epidemiol* 2007;**17**:511–3.  
506 doi:10.1016/j.annepidem.2006.12.005
- 507 44 Brion M-JA, Shakhbazov K, Visscher PM. Calculating statistical power in Mendelian randomization  
508 studies. *Int J Epidemiol* 2013;**42**:1497–501. doi:10.1093/ije/dyt179
- 509 45 International Epidemiological Association. OO, Burgess S. *International journal of epidemiology*. Oxford  
510 University Press 1996. <https://www.repository.cam.ac.uk/handle/1810/269697> (accessed 29 Mar  
511 2019).
- 512 46 Astle WJ, Elding H, Jiang T, *et al.* The Allelic Landscape of Human Blood Cell Trait Variation and Links to  
513 Common Complex Disease. *Cell* Published Online First: 2016. doi:10.1016/j.cell.2016.10.042
- 514 47 World Cancer Research Fund - American Institute for Cancer Research. Diet, Nutrition, Physical Activity  
515 and Cancer: a Global Perspective. 2018. <https://www.wcrf.org/dietandcancer> (accessed 13 Jun 2018).
- 516 48 Matejic M, de Batlle J, Ricci C, *et al.* Biomarkers of folate and vitamin B12 and breast cancer risk: report  
517 from the EPIC cohort. *Int J Cancer* Published Online First: 2017. doi:10.1002/ijc.30536
- 518 49 Chen P, Li C, Li X, *et al.* Higher dietary folate intake reduces the breast cancer risk: a systematic review  
519 and meta-analysis. *Br J Cancer* 2014;**110**:2327–38. doi:10.1038/bjc.2014.155
- 520 50 Papadimitriou N, Dimou N, Gill D, *et al.* Circulating concentrations of micro-nutrients and risk of breast  
521 cancer: A Mendelian randomization study. *bioRxiv* 2019;:668186. doi:10.1101/668186
- 522 51 Guo S, Jiang X, Chen X, *et al.* The protective effect of methylenetetrahydrofolate reductase C677T  
523 polymorphism against prostate cancer risk: Evidence from 23 case-control studies. *Gene* Published  
524 Online First: 2015. doi:10.1016/j.gene.2015.03.067
- 525 52 Moazzen S, Dolatkah R, Tabrizi JS, *et al.* Folic acid intake and folate status and colorectal cancer risk:

- 526 A systematic review and meta-analysis. *Clin Nutr* 2018;**37**:1926–34. doi:10.1016/J.CLNU.2017.10.010
- 527 53 Kennedy DA, Stern SJ, Matok I, *et al.* Folate Intake, *MTHFR* Polymorphisms, and the Risk of Colorectal  
528 Cancer: A Systematic Review and Meta-Analysis. *J Cancer Epidemiol* 2012;**2012**:1–24.  
529 doi:10.1155/2012/952508
- 530 54 Mackerras D, Tan J, Larter C. *Folic acid, selected cancers and all-cause mortality: a meta-analysis*. IFRAJ  
531 2014.
- 532 55 Zhang S-L, Chen T-S, Ma C-Y, *et al.* Effect of vitamin B supplementation on cancer incidence, death due  
533 to cancer, and total mortality: A PRISMA-compliant cumulative meta-analysis of randomized controlled  
534 trials. *Medicine (Baltimore)* 2016;**95**:e3485. doi:10.1097/MD.0000000000003485
- 535 56 Dhana A, Yen H, Li T, *et al.* Intake of folate and other nutrients related to one-carbon metabolism and  
536 risk of cutaneous melanoma among US women and men. *Cancer Epidemiol* 2018;**55**:176–83.  
537 doi:10.1016/j.canep.2018.06.006
- 538 57 Strickland KC, Krupenko NI, Krupenko SA. Molecular mechanisms underlying the potentially adverse  
539 effects of folate. *Clin Chem Lab Med* 2013;**51**:607–16. doi:10.1515/cclm-2012-0561
- 540 58 Visentin M, Zhao R, Goldman ID. The Antifolates. *Hematol Oncol Clin North Am* 2012;**26**:629–48.  
541 doi:10.1016/j.hoc.2012.02.002
- 542 59 Kim YI. Folate: A magic bullet or a double edged sword for colorectal cancer prevention? *Gut*. 2006.  
543 doi:10.1136/gut.2006.095463
- 544 60 Blount BC, Mack MM, Wehr CM, *et al.* Folate deficiency causes uracil misincorporation into human  
545 DNA and chromosome breakage: implications for cancer and neuronal damage. *Proc Natl Acad Sci U S*  
546 *A* 1997;**94**:3290–5. doi:10.1073/pnas.94.7.3290
- 547 61 Picó C, Serra F, Rodríguez AM, *et al.* Biomarkers of Nutrition and Health: New Tools for New  
548 Approaches. *Nutrients* 2019;**11**. doi:10.3390/nu11051092
- 549 62 Kim Y-I. 5,10-Methylenetetrahydrofolate Reductase Polymorphisms and Pharmacogenetics: A New  
550 Role of Single Nucleotide Polymorphisms in the Folate Metabolic Pathway in Human Health and  
551 Disease. *Nutr Rev* 2005;**63**:398–407. doi:10.1111/j.1753-4887.2005.tb00377.x
- 552 63 Staley JR, Burgess S. Semiparametric methods for estimation of a nonlinear exposure-outcome  
553 relationship using instrumental variables with application to Mendelian randomization. *Genet*  
554 *Epidemiol* 2017;**41**:341–52. doi:10.1002/gepi.22041
- 555 64 Forman JP, Rimm EB, Stampfer MJ, *et al.* Folate Intake and the Risk of Incident Hypertension Among  
556 US Women. *JAMA* 2005;**293**:320. doi:10.1001/jama.293.3.320
- 557 65 Han H, Guo W, Shi W, *et al.* Hypertension and breast cancer risk: a systematic review and meta-analysis.  
558 *Sci Rep* 2017;**7**:44877. doi:10.1038/srep44877
- 559 66 Liang Z, Xie B, Li J, *et al.* Hypertension and risk of prostate cancer: a systematic review and meta-  
560 analysis. *Sci Rep* 2016;**6**:31358. doi:10.1038/srep31358
